## PERSPECTIVAS

### EDITORIALES

- 105** ¿Esquizofrenia o esquizofrenias? El desafío del análisis genético de un trastorno complejo  
*Assen Jablensky, M.D., D.M.Sc.*
- 108** Llegando a las raíces: Intervención temprana en la vida y salud adulta  
*Ann Bullock, M.D.* **AUDIO**
- 111** Armando el rompecabezas del estrés de la madre y la genética del bebé para entender el desarrollo cerebral  
*Jim Hudziak, M.D.*
- 113** La disposición de cobertura de dependientes de la ley Affordable Care Act y los adultos jóvenes con trastornos de salud mental  
*Haiden A. Huskamp, Ph.D.*

### TRATAMIENTO EN PSIQUIATRÍA

- 115** Tratamiento de psicosis y manía en el período postparto  
*Veerle Bergink, M.D., Ph.D., et al.* **AUDIO**

### RESÚMENES Y RESEÑAS

- 124** Identificando predictores, moderadores y mediadores de la respuesta a los antidepresivos en el trastorno depresivo mayor: Enfoques a partir del uso de neuroimágenes  
*Mary L. Phillips, M.D., et al.*

## NUEVAS INVESTIGACIONES

### ARTÍCULOS

-  **139** Descubriendo la arquitectura de riesgos escondida en las esquizofrenias: Confirmación en tres estudios independientes de asociación del genoma completo  
*Javier Arnedo, M.S., et al.* **AUDIO • EDITORIAL**
-  **154** Intervención de visitas a domicilio a cargo de paraprofesionales para madres adolescentes y niños nativos norteamericanos: Resultados a los tres años de un ensayo aleatorizado controlado  
*Allison Barlow, M.P.H., Ph.D., et al.* **AUDIO • EMC • EDITORIAL**
- 163** Los haplotipos del gen COMT modulan las asociaciones de la ansiedad materna antenatal y la morfología cortical neonatal  
*Anqi Qiu, Ph.D., et al.* **EDITORIAL**
- 173** Aprendizaje ensayo a ensayo, basado en retroalimentación, en trastornos del espectro autista  
*Marjorie Solomon, Ph.D., et al.* **AUDIO • EMC • VIDEO**

182 El efecto de las expansiones del aseguramiento de adultos jóvenes de la ley Affordable Care Act en cuidados de salud mental en hospitales  
*Ezra Golberstein, Ph.D., et al.* AUDIO • EMC • EDITORIAL

190 Locus pleiotrópico para el reconocimiento de emociones y el volumen de la amígdala, identificado utilizando ligamiento univariado y bivariado  
*Emma E.M. Knowles, Ph.D., et al.*

## COMUNICADOS Y ACTUALIZACIONES

### CARTAS AL EDITOR

200 [Maternal C-Reactive Protein and Schizophrenia]  
*Jean-Paul Selten, M.D., Ph.D., y Jim van Os, M.D., Ph.D.*

200 [Response to Selten and van Os]  
*Sarah Canetta, Ph.D., y Alan S. Brown, M.D., M.P.H.*

201 [A New Role for Nortriptyline in Depression Associated With Vascular Disease?]  
*Hagen Kunte, M.D., et al.*

201 [Response to Kunte et al.]  
*Rudolf Uher, M.D., Ph.D.*

201 [Mentally Ill in Prison Are Not Forgotten]  
*Emil R. Pinta, M.D.*

202 [Response to Pinta]  
*David R. Rubinow, M.D.*

### RESEÑAS BIBLIOGRÁFICAS

203 [Fatal Pauses: Getting Unstuck Through the Power of No and the Power of Go]  
*Roger Peele, M.D., y Raymond Crowel, Psy.D.*

204 [Resilience and Aging: Research and Practice]  
*Frank W. Brown, M.D.*

204 [Correction]

## OTROS TEMAS DE INTERÉS

205 Educación Médica Continuada

**Cubierta:** [Navajo mother Jocelyn Billy Upshaw, shown with her daughter Mya in a cradle board, provided cultural consultation on the Family Spirit intervention, a home-visiting program for American Indian teen mothers and their children reported by Barlow et al. (p. 154). Photograph by Dominic Chavez; graphic art by Kris Rifkin.]

Article content that addresses **Core Competencies**, defined by the Accreditation Council of Graduate Medical Education and the American Board of Medical Specialties, is indicated by the following symbols:

-  Professionalism
-  Patient Care and Procedural Skills
-  Medical Knowledge
-  Practice-Based Learning and Improvement
-  Interpersonal and Communication Skills
-  Systems-Based Practice.

More information is available at [www.abms.org/maintenance\\_of\\_certification/MOC\\_competencies.aspx](http://www.abms.org/maintenance_of_certification/MOC_competencies.aspx)

### La Tabla de Contenidos y resúmenes de Este Número Está Disponible en Español

*(This issue's Table of Contents and abstracts are available in Spanish)*

Translation presented in collaboration with the Office of Global Health, Rutgers-Robert Wood Johnson Medical School

Support for this effort provided by ACTA Colombia.

#### Translation courtesy of

**Sergi Casals, M.A.**

Garuna, Medellín, Colombia ([www.garunaeditors.com](http://www.garunaeditors.com))

**Carlos Lopez Jaramillo, M.D.**

Universidad de Antioquia, Medellín, Colombia

**Javier I. Escobar, M.D., M.Sc.**

Rutgers-Robert Wood Johnson Medical School

# Descubriendo la arquitectura de riesgos escondida en las esquizofrenias: Confirmación en tres estudios independientes de asociación del genoma completo

Javier Arnedo, M.S., Dragan M. Svrakic, M.D., Ph.D., Coral del Val, Ph.D., Rocío Romero-Zaliz, Ph.D., Helena Hernández-Cuervo, M.D., Molecular Genetics of Schizophrenia Consortium, Ayman H. Fanous, M.D., Michele T. Pato, M.D., Carlos N. Pato, M.D., Ph.D., Gabriel A. de Erausquin, M.D., Ph.D., C. Robert Cloninger, M.D., Ph.D., Igor Zwir, Ph.D.

**Objetivo:** Los autores se propusieron demostrar que la esquizofrenia es un grupo heterogéneo de trastornos heredables causados por diferentes redes genotípicas que causan síndromes clínicos diferenciados.

**Método:** En un amplio estudio de asociación del genoma completo de casos con esquizofrenia y controles, los autores en primer lugar identificaron conjuntos de polimorfismos de un solo nucleótido (SNPs) que interactúan y que se presentan agrupados en ciertas personas (conjuntos de SNPs) independientemente del estado clínico. En segundo lugar, examinaron el riesgo de esquizofrenia de cada conjunto de SNPs y pusieron a prueba su replicabilidad en dos muestras independientes. En tercer lugar, identificaron redes genotípicas compuestas de conjuntos de SNPs que compartieran SNPs o sujetos. En cuarto lugar, identificaron conjuntos de características clínicas diferenciadas que se presentan agrupadas en casos particulares (conjuntos fenotípicos o síndromes clínicos) sin importar su origen genético. En quinto lugar, examinaron si los conjuntos de SNPs estaban asociados con conjuntos fenotípicos diferenciados de una manera replicable en los tres estudios.

**Resultados:** Los autores identificaron 42 conjuntos de SNPs asociados con un riesgo del 70% o mayor de esquizofrenia y confirmaron 34 (81%) o más con un riesgo alto de esquizofrenia similar en dos muestras independientes. Diecisiete conjuntos de SNPs no compartían ningún SNP ni ningún sujeto. Estas redes genotípicas desagrupadas se asociaron con productos genéticos diferenciados y con síndromes clínicos (i.e., las esquizofrenias) con variaciones en síntomas y severidad. Las asociaciones entre las redes genotípicas y los síndromes clínicos fueron complejas y mostraron multifinalidad y equifinalidad. Las redes interactivas explicaron el riesgo de esquizofrenia más que el efecto promedio de todos los SNPs (24%).

**Conclusiones:** La esquizofrenia es un grupo de trastornos heredables causados por un número moderado de redes genotípicas separadas, asociadas con varios síndromes clínicos diferenciados.

(*Am J Psychiatry* 2015; 172:139–153)

## ARTICLE

## Intervención de visitas a domicilio a cargo de paraprofesionales para madres adolescentes y niños nativos norteamericanos: Resultados a los tres años de un ensayo aleatorizado controlado

Allison Barlow, M.P.H., Ph.D., Britta Mullany, Ph.D., M.H.S., Nicole Neault, M.P.H., Novalene Goklish, B.S., Trudy Billy, B.S., Ranelda Hastings, B.S., Sherilynn Lorenzo, Crystal Kee, B.S., Kristin Lake, M.P.H., Cleve Redmond, Ph.D., Alice Carter, Ph.D., John T. Walkup, M.D.

**Objetivo:** La ley *Affordable Care Act* (Ley de Atención Asequible) ofrece financiación para programas de visitas a domicilio con el fin reducir las desigualdades en atención sanitaria, a pesar de la limitada evidencia de que los programas existentes pueden superar los retos de implementación y evaluación con las poblaciones en riesgo. Los autores reportaron resultados a los 36 meses de la intervención *Family Spirit* (Espíritu familiar) de visitas a domicilio a cargo de paraprofesionales para madres adolescentes y niños nativos norteamericanos.

**Método:** A un grupo de adolescentes nativas norteamericanas en embarazo (N=322, edad media=18,1 años) de cuatro comunidades de reservas del suroeste de los Estados Unidos, se les asignó aleatoriamente la intervención *Family Spirit* más atención estándar optimizada, o solamente atención estándar optimizada. Se evaluaron los resultados de las madres y de los hijos a las 28 y a las 36 semanas de gestación y a los 2, 6, 12, 18, 24, 30 y 36 meses después del parto.

**Resultados:** Al inicio del estudio, las madres tenían una alta tasa de abuso de sustancias (>84%), síntomas depresivos (>32%), abandono de la escuela (>57%) e inestabilidad residencial (51%). La permanencia en el estudio fue del ≥83%.

Desde el embarazo hasta 36 meses después del parto, las madres en el grupo de la intervención tuvieron un conocimiento de lo que significa ser padres y un locus de control parental significativamente mayores (tamaño del efecto=0,42 y 0,17 respectivamente), menos síntomas depresivos (tamaño del efecto=0,16) y problemas de externalización (tamaño del efecto=0,14), y menor consumo de marihuana (odds ratio=0,65) y de drogas ilegales (odds ratio=0,67) en el último mes. Los niños en el grupo de la intervención tuvieron menos problemas de externalización (tamaño del efecto=0,23), internalización (tamaño del efecto=0,23) y desregulación (tamaño del efecto=0,27).

**Conclusiones:** La intervención paraprofesional de visitas a domicilio promovió un ejercicio efectivo de la paternidad, redujo los riesgos maternos y mejoró los resultados del desarrollo infantil en el subgrupo de la población estadounidense con menos recursos y más desigualdades en salud del comportamiento. Los métodos y los resultados pueden contribuir a los esfuerzos federales para divulgar y sostener las intervenciones basadas en la evidencia de visitas a domicilio en poblaciones en riesgo.

(*Am J Psychiatry* 2015; 172:154–162)

# Los haplotipos del gen COMT modulan las asociaciones de la ansiedad materna prenatal y la morfología cortical neonatal

Anqi Qiu, Ph.D., Ta Anh Tuan, M.S., Mei Lyn Ong, Ph.D., Yue Li, B.S., Helen Chen, M.D., Anne Rifkin-Graboi, Ph.D., Birit F.P. Broekman, M.D., Kenneth Kwek, M.D., Seang-Mei Saw, Ph.D., Yap-Seng Chong, M.D., Peter D. Gluckman, Ph.D., Marielle V. Fortier, M.D., Joanna Dawn Holbrook, Ph.D., Michael J. Meaney, Ph.D.

**Objetivo:** La exposición a la ansiedad materna prenatal y variaciones genéticas complejas pueden moldear el desarrollo cerebral fetal. En particular, el gen catecol-O-metiltransferasa (COMT), localizado en el cromosoma 22q11.2, regula la señalización de catecolaminas en la corteza prefrontal y está implicado en la responsividad al estrés, el dolor y la ansiedad. Este estudio examinó si existen polimorfismos de un solo nucleótido (SNPs) particulares del gen COMT y sus haplotipos que moderen la asociación entre la ansiedad materna prenatal y el desarrollo cortical en el útero.

**Método:** Un total de 146 neonatos fueron genotipificados y se les hizo IRM poco después de haber nacido. La morfología cortical neonatal se caracterizó utilizando el grosor cortical. En la semana 26 de embarazo se evaluó la ansiedad materna prenatal con el *State-Trait Anxiety Inventory* (Inventario de Ansiedad Estado-Rasgo).

**Resultados:** SNPs particulares del gen COMT (val158met, rs737865 y rs165599) modularon la asociación entre la ansiedad materna prenatal y el grosor cortical prefrontal y parietal

en neonatos. Con base en el análisis de tendencia de regresión de haplotipo, los hallazgos también mostraron que entre los haplotipos rs737865-val158met-rs165599, las probabilidades del haplotipo A-val-G (AGG) modularon las asociaciones positivas de la ansiedad materna prenatal con el grosor cortical en la corteza prefrontal ventrolateral derecha y la corteza parietal superior derecha y precúneo. En contraste, las probabilidades del haplotipo G-met-A (GAA) modularon las asociaciones negativas de la ansiedad materna prenatal con el grosor cortical en el giro precentral bilateral y la corteza prefrontal dorsolateral.

**Conclusiones:** Estos resultados sugieren que la asociación entre la ansiedad materna y el neurodesarrollo en el útero es modificada por medio de variación genética compleja en el gen COMT. Dicha moderación genética puede explicar, en parte, la variación asociada con el bienestar emocional materno en los resultados fenotípicos en los descendientes.

(*Am J Psychiatry* 2015; 172:163–172)

## ARTICLE

## Aprendizaje ensayo a ensayo, basado en retroalimentación, en trastornos del espectro autista

Marjorie Solomon, Ph.D., Michael J. Frank, Ph.D., J. Daniel Ragland, Ph.D., Anne C. Smith, Ph.D., Tara A. Niendam, Ph.D., Tyler A. Lesh, Ph.D., David S. Grayson, B.S., Jonathan S. Beck, B.S., John C. Matter, B.S., Cameron S. Carter, M.D.

**Objetivo:** Los déficits de aprendizaje son un aspecto central de los trastornos del espectro autista. Los autores investigaron la base cognitiva y neural de estos déficits en adultos jóvenes con trastornos del espectro autista, utilizando un paradigma probabilístico bien definido de refuerzo del aprendizaje.

**Método:** La tarea de selección probabilística se implementó entre participantes con trastornos del espectro autista (N=22) apareados con participantes con desarrollo normal (N=25), entre 18 y 40 años de edad, utilizando IRM funcional rápida con eventos relacionados. Se entrenó a los participantes para escoger el estímulo correcto en pares de probabilidad alta (AB), probabilidad media (CD) y probabilidad baja (EF), y se les dio retroalimentación válida el 80%, 70%, and 60% de las veces, respectivamente. Los análisis basados en vóxel y moduladores paramétricos del cerebro completo examinaron el aprendizaje temprano y tardío durante las etapas de estímulo y de retroalimentación de la tarea.

**Resultados:** Los grupos tuvieron un rendimiento comparable en los pares de probabilidad media y baja. Las personas con desarrollo normal mostraron mayor precisión en el par de

probabilidad alta, mejor rendimiento *win-stay* (selección del estímulo anteriormente recompensado en el siguiente ensayo del mismo tipo), y una mayor implicación de la corteza prefrontal anterior y media durante la etapa de estímulo, lo que sugiere el desarrollo de una memoria de trabajo basada en las recompensas intacta para los valores de los estímulos recientes. Durante la etapa de retroalimentación, los individuos con trastornos del espectro autista exhibieron mayor implicación de las cortezas anterior cingulada y orbito-frontal en comparación con los individuos con un desarrollo normal, lo que indica que hay actividad continua ensayo-a ensayo, relacionada con el procesamiento de la retroalimentación.

**Conclusiones:** Las personas con trastornos del espectro autista muestran déficits de aprendizaje que reflejan una capacidad deteriorada de desarrollar una memoria de trabajo basada en recompensas que sea efectiva para guiar la selección de estímulos. Lo que hacen es seguir confiando en el procesamiento de la retroalimentación ensayo a ensayo para apoyar el aprendizaje dependiente de la implicación de las cortezas anterior cingulada y orbito-frontal.

(*Am J Psychiatry* 2015; 172:173–181)

# El efecto de las expansiones del aseguramiento de adultos jóvenes de la ley Affordable Care Act en cuidados de salud mental en hospitales

Ezra Golberstein, Ph.D., Susan H. Busch, Ph.D., Rebecca Zaha, M.P.H., Shelly F. Greenfield, M.D., M.P.H., William R. Beardslee, M.D., Ellen Meara, Ph.D.

**Objetivo:** La cobertura de los seguros de salud para adultos jóvenes ha aumentado desde 2010 cuando la ley *Affordable Care Act* (Ley de Atención Asequible, ACA por sus siglas en inglés) exigió a las aseguradoras que permitieran que los niños permanecieran como dependientes en las pólizas de los padres hasta los 26 años. Este estudio estimó la asociación entre la disposición de cobertura de dependientes y los cambios en el uso que los adultos jóvenes hacen de los servicios de los hospitales para trastornos de abuso de sustancias y trastornos psiquiátricos que no son de abuso de sustancias.

**Método:** Los autores hicieron una comparación casi-experimental de una muestra nacional de admisiones de pacientes internos a hospitales generales no relacionadas con nacimientos (un total de 2.670.463 admisiones, 430.583 de las cuales tenían diagnósticos psiquiátricos primarios) y visitas con diagnósticos psiquiátricos al departamento de urgencias de California (N=11.139.689), utilizando datos desde el 2005 al 2011. Los análisis compararon los adultos jóvenes que eran el objetivo de la disposición de cobertura de dependientes de la ACA (entre 19 y 25 años de edad) y los que no lo eran (entre 26 y 29 años de edad), estimando cambios en el uso antes y después de la implementación de la disposición de cobertura de dependientes. Las medidas de resultados primarios incluyeron admisiones trimestrales de pacientes internos para diag-

nósticos primarios de cualquier diagnóstico psiquiátrico por 1.000 habitantes, visitas al departamento de emergencias con cualquier diagnóstico psiquiátrico por 1.000 habitantes, y fuente de pago.

**Resultados:** La expansión de la cobertura de dependientes se asoció con un 0,14 más de admisiones para los pacientes internos por diagnósticos psiquiátricos por 1.000 para jóvenes entre 19 y 25 años (objetivo de la ACA) que para los de entre 26 y 29 años (no objetivo de la ACA). La expansión de la cobertura se asoció con un 0,45 menos de visitas al departamento de urgencias por 1.000 en California. La probabilidad de que las admisiones de pacientes internos nacionalmente y a los departamentos de urgencias en California fueran sin seguro, disminuyó significativamente.

**Conclusiones:** Las disposiciones de cobertura de dependientes de la ACA produjeron aumentos modestos de las admisiones de pacientes psiquiátricos a hospitales generales y tasas más altas de cobertura de seguros de salud para adultos jóvenes a nivel nacional. Se observaron mejores tasas de visitas a los departamentos de urgencias en California.

(*Am J Psychiatry* 2015; 172:182–189)

## ARTICLE

# Locus pleiotrópico para el reconocimiento de emociones y el volumen de la amígdala, identificado utilizando ligamiento univariado y bivariado

Emma E.M. Knowles, Ph.D., D. Reese McKay, Ph.D., Jack W. Kent, Jr., Ph.D., Emma Sprooten, Ph.D., Melanie A. Carless, Ph.D., Joanne E. Curran, Ph.D., Marcio A.A. de Almeida, Ph.D., Thomas D. Dyer, Ph.D., Harald H.H. Göring, Ph.D., Rene L. Olvera, M.D., Ravi Duggirala, Ph.D., Peter T. Fox, M.D., Laura Almasy, Ph.D., John Blangero, Ph.D., David C. Glahn, Ph.D.

**Objetivo:** El papel de la amígdala en el reconocimiento de emociones está claro, y se ha demostrado que el volumen de la amígdala y el rendimiento del reconocimiento de emociones, por separado, son rasgos altamente heredables, pero no se ha explorado el papel potencial de las influencias genéticas comunes sobre ambos rasgos. Los autores investigaron las influencias pleiotrópicas del volumen de la amígdala y el rendimiento del reconocimiento de emociones.

**Método:** En una muestra de pedigríes seleccionados aleatoriamente (N=858), los autores utilizaron una combinación de ligamiento univariado y bivariado para investigar la pleiotropía entre el volumen de la amígdala y el rendimiento del reconocimiento de emociones y continuaron con un análisis de asociación.

**Resultados:** Los autores encontraron una región pleiotrópica para el volumen de la amígdala y el rendimiento del reconocimiento de emociones en el cromosoma 4q26 (LOD score=4,40). El análisis de asociación realizado en la región que subyace el pico de ligamiento bivariado reveló una variante que llega al nivel de significancia corregido (corrección

de Bonferroni  $p=5,01 \times 10^{-5}$ ) en un intrón del gen PDE5A (rs2622497,  $p=4,4 \times 10^{-5}$ ) y que influye a ambos rasgos. El PDE5A ha estado implicado previamente en los déficits de memoria de reconocimiento y está expresado en las estructuras subcorticales que se cree que subyacen a la capacidad de memoria, incluyendo la amígdala.

**Conclusiones:** Este estudio extiende nuestro conocimiento sobre la etiología compartida entre la amígdala y el reconocimiento de emociones mostrando que el solapamiento entre el volumen de la amígdala y el rendimiento del reconocimiento de emociones se debe, por lo menos parcialmente, a influencias genéticas comunes. Además, este estudio identifica un locus pleiotrópico para los dos rasgos y una variante asociada, que localiza la señal genética incluso con más precisión. Estos resultados, cuando se toman en el contexto de la investigación previa, resaltan la utilidad potencial de los inhibidores de la enzima PDE5 para mejorar los déficits de reconocimiento de emociones en personas que sufren de enfermedades mentales o neurodegenerativas.

(*Am J Psychiatry* 2015; 172:190–199)
