FEBRUARY 2015 | VOLUME 172 | NUMBER 2

# The American Journal of Psychiatry

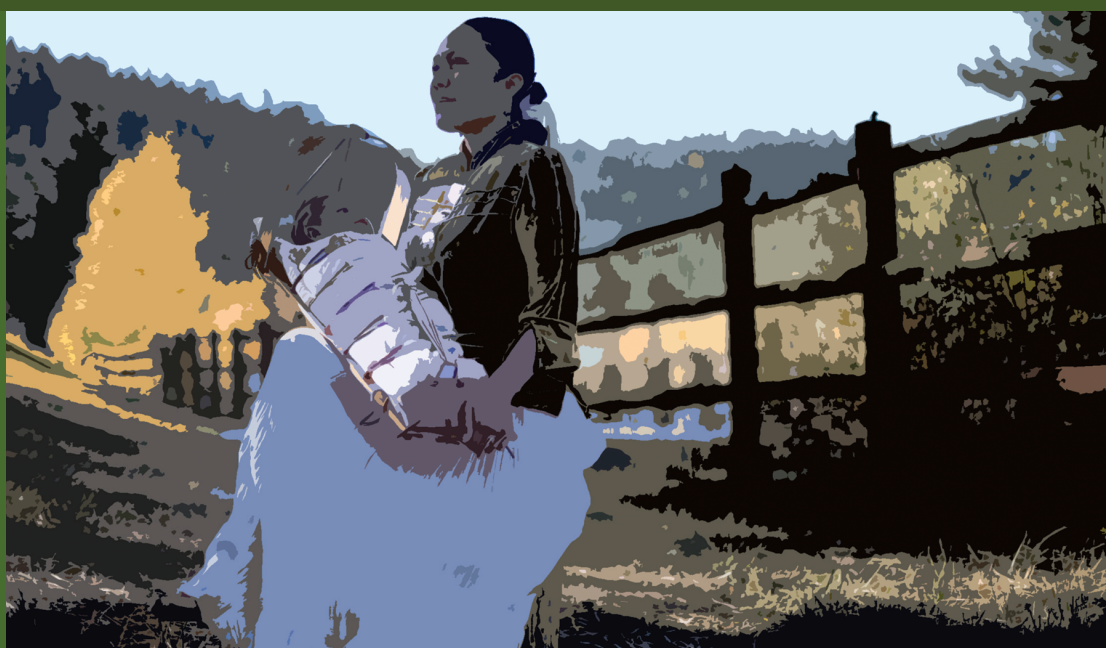

Treatment of Psychosis and Mania in the Postpartum Period

Uncovering the Hidden Risk Architecture of the Schizophrenias:  
Confirmation in Three Independent Genome-Wide Association Studies

Paraprofessional-Delivered Home-Visiting Intervention for  
American Indian Teen Mothers and Children:  
3-Year Outcomes From a Randomized Controlled Trial

COMT Haplotypes Modulate Associations of  
Antenatal Maternal Anxiety and Neonatal Cortical Morphology

Official Journal of the American Psychiatric Association  
[ajp.psychiatryonline.org](http://ajp.psychiatryonline.org)
