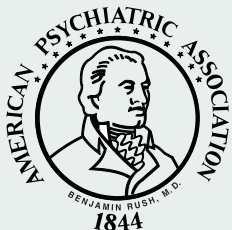

# The American Journal of Psychiatry

Official Journal of the American Psychiatric Association

## Officers 2014–2015

### President

Paul Summergrad, M.D.

### President-Elect

Renée L. Binder, M.D.

### Treasurer

Frank W. Brown, M.D.

### Secretary

Maria A. Oquendo, M.D.

### Assembly

#### Speaker

Jenny L. Boyer, M.D., Ph.D., J.D.

#### Speaker-Elect

Glenn A. Martin, M.D.

#### Recorder

Daniel J. Anzia, M.D.

### Office of the CEO and Medical Director

#### CEO and Medical Director

Saul Levin, M.D., M.P.A.

### Board of Trustees

Jeffrey Akaka, M.D.

R. Scott Benson, M.D.

Lara J. Cox, M.D., M.S.

Brian Crowley, M.D.

Anita S. Everett, M.D.

Jeffrey L. Geller, M.D., M.P.H.

Dilip V. Jeste, M.D.

Judith F. Kashtan, M.D.

Jeffrey A. Lieberman, M.D.

Molly K. McVoy, M.D.

John M. Oldham, M.D.

Vivian B. Pender, M.D.

Gail E. Robinson, M.D.

Ravi N. Shah, M.D.

Melinda Young, M.D.

## Editorial Board

### Editor

Robert Freedman, M.D.

### Deputy Editors

David A. Lewis, M.D.

Robert Michels, M.D.

Daniel S. Pine, M.D.

Susan K. Schultz, M.D.

Carol A. Tamminga, M.D.

### Associate Editors

Alan Brown, M.D., M.P.H.

Tyrone Cannon, Ph.D.

Benjamin G. Druss, M.D., M.P.H.

Graham J. Emslie, M.D.

Daniel C. Javitt, M.D.

Bankole Johnson, M.D.

Ellen Leibenluft, M.D.

Joan L. Luby, M.D.

Constantine G. Lyketsos, M.D., M.H.S.

Helen S. Mayberg, M.D., F.R.C.P.C.

Barbara Milrod, M.D.

Terrie E. Moffitt, Ph.D.

A. John Rush, M.D.

Anita Thapar, M.B.B.Ch., F.R.C.Psych.,  
Ph.D., F.Med.Sci.

Mauricio Tohen, M.D., Dr.PH., M.B.A.

Eduard Vieta, M.D., Ph.D.

Katherine L. Wisner, M.D., M.S.

Xin Yu, M.D.

### Editor Emerita

Nancy C. Andreasen, M.D., Ph.D.

### Former Editors

Amariah Brigham, M.D., 1844–1849

T. Romeyn Beck, M.D., 1849–1854

John P. Gray, M.D., 1854–1886

G. Alder Blumer, M.D., 1886–1894

Richard Dewey, M.D., 1894–1897

Henry M. Hurd, M.D., 1897–1904

Edward N. Brush, M.D., 1904–1931

Clarence B. Farrar, M.D., 1931–1965

Francis J. Braceland, M.D., 1965–1978

John C. Nemiah, M.D., 1978–1993

### Editorial Staff

#### Executive Editor

Michael D. Roy

#### Senior Editor/Features Writer

Jane Weaver, E.L.S.

#### Senior Editor

John J. Guardiano, Ph.D.

#### Production Manager

Susan Westrate

#### Assistant Editors

Katie Duffy

Angela Moore

#### Editorial Support Services Manager

Nicole Gray

#### Editorial Assistant

Linda LaCour

#### Editorial Assistant/Permissions

##### Coordinator

Heidi Koch

#### Assistants to the Editors

Lois Lilienthal

Laura English

Rachel Hogg

Russell A. Scholl

### Publisher

Rebecca D. Rinehart

# The *Residents'* JOURNAL

## THE AMERICAN JOURNAL OF PSYCHIATRY RESIDENTS' JOURNAL

January 2015

Volume 10

Issue 1

### Inside

- 2 The Pharmacologic and Nonpharmacologic Treatment of Opioid Use Disorder  
Rohit Aiyer, M.D.
- 5 A Case of New-Onset Schizophrenia With Gilbert's Syndrome  
Cody Armstrong, M.D.
- 7 Pain, Depression, and Delirium: Evaluation of the Complex Consultation-Liaison Patient  
Joanna Koutros, M.D.
- 9 Revisiting the Guidelines for Violence Risk Assessment of Patients in the Psychiatric Emergency or Inpatient Setting  
Swapnil Rath, M.D.
- 11 Toward Forging a National Policy for Police Mental Health Training  
Rehan Puri, M.D., M.P.H.
- 12 Marijuana and Madness, 2nd Edition Book Review  
Review by Tony Pham
- 14 Residents' Resources

### In This Issue

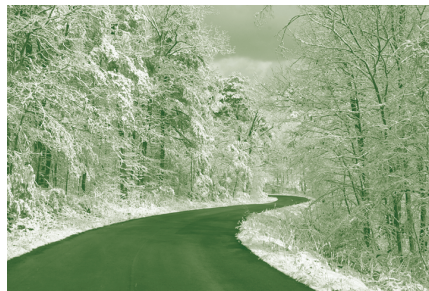

This month's issue of the *Residents' Journal* focuses on a variety of topics. Rohit Aiyer, M.D., examines the pharmacologic and nonpharmacologic treatment of opioid use disorder and provides discussion of diagnostic criteria, withdrawal symptoms and monitoring, relapse prevention, and overdose. In a case report, Cody Armstrong, M.D., explores the link between schizophrenia with Gilbert's syndrome in a patient with changing bilirubin levels. In another case report, Joanna Koutros, M.D., emphasizes the effect of depression on a patient's somatic complaints and the importance of recognizing symptom clusters. Swapnil Rath, M.D., outlines and explains the guidelines for violence risk assessment in the psychiatric emergency or inpatient setting. Rehan Puri, M.D., comments on a national policy for police mental health training. Lastly, Tony Pham reviews the second edition of *Marijuana and Madness*.

Editor-in-Chief  
Misty Richards, M.D., M.S.

Senior Deputy Editor  
Rajiv Radhakrishnan, M.B.B.S., M.D.

Deputy Editor  
Tobias Wasser, M.D.

Associate Editors  
Ijeoma Chukwu, M.D., M.P.H.  
Kathleen Mary Patchan, M.D.

Media Editor  
Holly S. Peek, M.D., M.P.H.

Staff Editor  
Angela Moore

Editors Emeriti  
Sarah B. Johnson, M.D.  
Molly McVoy, M.D.  
Joseph M. Cenimele, M.D.  
Sarah M. Fayad, M.D.  
Monifa Seawell, M.D.  
Arshya Vahabzadeh, M.D.

### Editor-in-Chief

Misty Richards, M.D., M.S.

### Senior Deputy Editor

Rajiv Radhakrishnan, M.B.B.S., M.D.

### Deputy Editor

Tobias Wasser, M.D.

### Associate Editors

Ijeoma Chukwu, M.D., M.P.H.

Kathleen Mary Patchan, M.D.

### Media Editor

Holly S. Peek, M.D., M.P.H.

*The Residents' Journal* accepts manuscripts authored by medical students, resident physicians, and fellows. To submit your paper, please visit the manuscript submission site at [mc.manuscriptcentral.com/appi-ajp](http://mc.manuscriptcentral.com/appi-ajp) and either create an account or use your existing account. For manuscript type, select "Residents." Then follow the instructions to upload your manuscript. Residents who are interested in participating as Guest Section Editors should e-mail *The Residents' Journal* Editor-in-Chief Misty Richards at [misty.richards@gmail.com](mailto:misty.richards@gmail.com).

*The Residents' Journal* is sent free-of-charge to all psychiatry residents. Anyone interested in being included on the distribution list should contact Angela Moore, *The Residents' Journal* staff editor at [ajp@psych.org](mailto:ajp@psych.org) with "Subscribe to Residents' Journal" in the subject line.

To access the complete *Residents' Journal* archives, visit [ajp.psychiatryonline.org/residents\\_journal](http://ajp.psychiatryonline.org/residents_journal)

# THE AMERICAN PSYCHIATRIC ASSOCIATION

1000 Wilson Blvd., Suite 1825, Arlington, VA 22209-3901  
(888) 357-7924 (toll-free inside the U.S. and Canada) / (703) 907-7300  
web site: [www.psychiatry.org](http://www.psychiatry.org) • e-mail: [apa@psych.org](mailto:apa@psych.org)

## Chairpersons of Councils, Commissions, Committees, and Task Forces

### Standing Committees

|                             |                                |
|-----------------------------|--------------------------------|
| <b>Bylaws</b>               | Rebecca W. Brendel, M.D., J.D. |
| <b>Elections</b>            | Barry K. Herman, M.D.          |
| <b>Ethics</b>               | Richard D. Milone, M.D.        |
| <b>Finance and Budget</b>   | Alan F. Schatzberg, M.D.       |
| <i>Audit</i>                | Frank W. Brown, M.D.           |
| <i>Investment Oversight</i> | David Fassler, M.D.            |
| <b>Joint Reference</b>      | Renée L. Binder, M.D.          |
| <b>Membership</b>           | Rahn K. Bailey, M.D.           |
| <b>Nominating</b>           | Jeffrey A. Lieberman, M.D.     |
| <b>Tellers</b>              | Hind Benjelloun, M.D.          |

### Councils

#### **Council on Addiction Psychiatry**

Frances R. Levin, M.D.

#### **Council on Advocacy and Government Relations**

Barry B. Perlman, M.D.

*Advocacy and Litigation Funding*

Jack Drescher, M.D.

*Caucus of State Hospital Psychiatrists*

*Caucus of VA Psychiatrists*

#### **Council on Children, Adolescents, and Their Families**

Louis J. Kraus, M.D.

*Agnes Purcell McGavin Award*

Christopher J. McDougale, M.D.

*Blanche F. Ittleson Research Award*

*Caucus of Psychiatrists Treating Persons With Intellectual Disabilities*

*College Mental Health Caucus*

#### **Council on Communications**

Raymond J. DePaulo, M.D.

#### **Council on Geriatric Psychiatry**

Robert P. Roca, M.D.

#### **Council on Healthcare Systems and Financing**

Harsh K. Trivedi, M.D.

*Reimbursement for Psychiatric Care*

Bruce J. Schwartz, M.D.

*RBRVS, Codes and Reimbursement*

Ronald M. Burd, M.D.

#### **Council on International Psychiatry**

Dilip V. Jeste, M.D.

*Caucus on Global Mental Health and Psychiatry*

#### **Council on Medical Education and Lifelong Learning**

Richard F. Summers, M.D.

*APA Public Psychiatry Fellowship Selection Committee*  
Christina V. Mangurian, M.D.

*APA/SAMHSA Minority Fellowship Selection and Advisory*  
Altha J. Stewart, M.D.

*Caucus on MOC Issues*

*Caucus of Resident-Fellow Members*

*Scientific Program*

Philip R. Muskin, M.D.

*Scientific Program Committee of the Institute on Psychiatric Services*

Hunter L. McQuiston, M.D.

*Subcommittee on Joint Sponsorship of Continuing Medical Education (CME)*

*Vestermark Award Committee*

Jonathan F. Borus, M.D.

#### **Council on Minority Mental Health and Health Disparities**

Sandra C. Walker, M.D.

*Caucus of Rural Psychiatrists*

*Caucus on Religion, Spirituality and Psychiatry*

#### **Council on Psychiatry And Law**

Steven K. Hoge, M.D.

*Caucus of Correctional Psychiatrists*

*Isaac Ray/Human Rights Award*

Mardoche Sidor, M.D.

*Judicial Action*

Paul S. Appelbaum, M.D.

*Manfred S. Guttmacher Award*

David A. Lowenthal, M.D.

#### **Council on Psychosomatic Medicine (Consultation Liaison Psychiatry)**

David F. Gitlin, M.D.

#### **Council on Quality Care**

Joel Yager, M.D.

*Mental Health Information Technology*

Steven Roy Daviss, M.D.

*Steering Committee on Practice Guidelines*

Michael J. Vergare, M.D.

#### **Council on Research**

Dwight L. Evans, M.D.

*Caucus of Psychiatrists Treating Persons with Eating Disorders*

*Caucus on Alternative and Complementary Medicine*

*Psychiatric Dimensions of Disasters*

Charles R. Marmar, M.D.

*Research Awards*

B. Timothy Walsh, M.D.

*Task Force to Revise the Practice of Electroconvulsive Therapy*

# There's So Much More to AJP Than Meets the Page!

Visit *The American Journal of Psychiatry's* website on PsychiatryOnline for the following features!

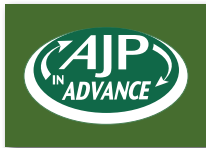

## AJP in Advance

The very latest research advances!

At **AJP in Advance**, you can discover the following before their appearance in print:

### **Developmental Change in Amygdala Reactivity During Adolescence: Effects of Family History of Depression and Stressful Life Events**

In a longitudinal fMRI study in more than 150 adolescents without a depression diagnosis, family history of depression and high levels of life stress were each associated with increased amygdala reactivity, as is seen in individuals with depression.

### **Effects of Cognitive Bias Modification Training on Neural Alcohol Cue Reactivity in Alcohol Dependence**

In a comparison of cognitive bias modification training and sham training in abstinent alcohol-dependent patients, bias modification training produced greater reductions in amygdala response and self-reported craving to alcohol cues.

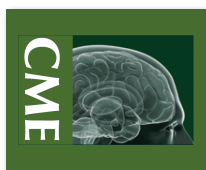

## AJP CME

Three articles in this issue form the basis of a short course with questions that can be answered for up to 1 *AMA PRA Category 1 Credit™* each by visiting <http://psychiatryonline.org/cme> and clicking on the "American Journal of Psychiatry" tab. CME credit is issued only **online**, and a paid subscription to AJP CME course program is required. This month's courses appear on pages 205–208.

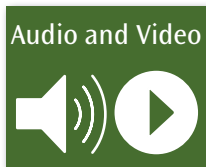

Audio and Video

## Have You Heard?

With AJP Audio you can listen to highlights of this issue. This month, Deputy Editor Susan K. Schultz, M.D., discusses treatment for postpartum psychosis and mania, a home-visiting intervention for pregnant teenage American Indian mothers, brain patterns underlying learning deficits in autism spectrum disorders, an approach to the genetics of schizophrenia focusing on clusters of genetic variants and clusters of clinical features, and effects of the Affordable Care Act's expansion of insurance for young adults on rates of hospital admissions and emergency department visits.

Also, visit the online edition of this month's *Journal* to view a video of Deputy Editor Daniel S. Pine, M.D., presenting highlights from the issue.

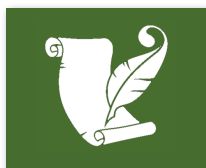

## Revisit the field's rich history!

### **50 years ago this month: "Improving Health Insurance Coverage for Psychiatric Illness"**

Dr. Robert H. Felix, the first director of NIMH, surveys the state of insurance coverage of mental health treatment and the various barriers to improvements in coverage, and summarizes proposals made by the NIMH Task Force on Insurance, which was formed as follow-up to President Kennedy's February 1963 special message to the Congress on mental illness and mental retardation.

### **25 years ago this month: "Emergence of Intense Suicidal Preoccupation During Fluoxetine Treatment"**

Dr. Martin H. Teicher and colleagues present the cases of "six depressed patients free of recent serious suicidal ideation" who "developed intense, violent suicidal preoccupation after 2–7 weeks of fluoxetine treatment."

American  
Psychiatric  
Publishing

A Division of American Psychiatric Association

[ajp.psychiatryonline.org](http://ajp.psychiatryonline.org)

[www.appi.org](http://www.appi.org) • 1-800-368-5777 • Fax: 703-907-1091 • Email: [appi@psych.org](mailto:appi@psych.org)

Priority Code AH1330

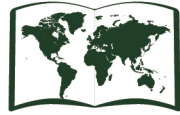

# SHARP

Shanghai Archives of Psychiatry · Since 1959

上 海 精 神 医 学

WWW.SAPONLINE.ORG/EN

DECEMBER 2014 • VOL. 26 • NO. 6

## IN THIS ISSUE

<http://dx.doi.org/10.11919/j.issn.1002-0829.214184>

## META-ANALYSIS

**Comparison of psychological placebo and waiting list control conditions in the assessment of cognitive behavioral therapy for the treatment of generalized anxiety disorder: a meta-analysis**

Zhipei ZHU, Li ZHANG, Jiangling JIANG, Wei LI, Xinyi CAO, Zhirui ZHOU, Tianhao ZHANG, Chunbo LI

<http://dx.doi.org/10.11919/j.issn.1002-0829.214173>

## ORIGINAL RESEARCH ARTICLES

**Effect of self-management training on adherence to medications among community residents with chronic schizophrenia: a single-blind randomized controlled trial in Shanghai, China**

Bin ZHOU, Yiwei GU

<http://dx.doi.org/10.11919/j.issn.1002-0829.214076>

**Prospective 8-week trial on the effect of olanzapine, quetiapine, and aripiprazole on blood glucose and lipids among individuals with first-onset schizophrenia**

Shufen ZHANG, Guanghua LAN

<http://dx.doi.org/10.11919/j.issn.1002-0829.214037>

**Sexual dysfunction in outpatients with schizophrenia in Turkey: a cross-sectional study**

Cicek HOCAOGLU, Fatmagul H. CELIK, Gokhan KANDEMIR, Hulya GUVELI, Bulent BAHCECI

<http://dx.doi.org/10.11919/j.issn.1002-0829.214101>

## FORUM:

### ANTIDEPRESSANT POLYPHARMACY

**When is antidepressant polypharmacy appropriate in the treatment of depression?**

Tianmei SI, Ping WANG

<http://dx.doi.org/10.11919/j.issn.1002-0829.214152>

**Provide optimized antidepressant monotherapy with multiple drugs before considering antidepressant polypharmacy**

Tammy SAAH, Steven J GARLOW, Mark Hyman RAPAPORT

<http://dx.doi.org/10.11919/j.issn.1002-0829.214182>

**Combining antidepressants**

David L. DUNNER

<http://dx.doi.org/10.11919/j.issn.1002-0829.214177>

**Evaluation of antidepressant polypharmacy and other interventions for treatment-resistant depression**

Daihui PENG, Yiru FANG

<http://dx.doi.org/10.11919/j.issn.1002-0829.214180>

## CASE REPORT

**Neuroleptic malignant syndrome in a patient treated with lithium carbonate and haloperidol**

Yanfen YANG, Yahui GUO, Aiguo ZHANG

<http://dx.doi.org/10.11919/j.issn.1002-0829.214099>

## RESEARCH METHODS IN PSYCHIATRY

**Secondary analysis of existing data: opportunities and implementation**

Hui G. CHENG, Michael R. PHILLIPS

<http://dx.doi.org/10.11919/j.issn.1002-0829.214171>

## BIostatistics in Psychiatry (24)

**Use of personalized Dynamic Treatment Regimes (DTRs) and Sequential Multiple Randomized Trials (SMARTs) in mental health studies**

Ying LIU, Donglin ZENG, Yuanjia WANG

<http://dx.doi.org/10.11919/j.issn.1002-0829.214172>
